# Supplementary material for: Temperature-triggered order–disorder phase transition in molecular-ionic material N-butyldiethanolammonium picrate monohydrate
Source: Royal Society of Chemistry journal article supplement (doi:10.1039/c6ra12178k), 2016-01-01
Supplement: c6ra12178k1.pdf [file c6ra12178k1.pdf]

## Supporting Information

### Temperature-triggered Order-Disorder Phase Transition in Molecular-Ionic Material N-butyldiethanolammonium Picrate Monohydrate

Tariq Khan, Muhammad Adnan Asghar, Zhihua Sun\*, Chengmin Ji, Lina Li, Sangen

Zhao and Junhua Luo\*

#### Table of Contents:

**Figure S1.** Powder X-ray diffraction pattern of BEAPM.

**Figure S2.** IR spectrum of picric acid and the sample.

**Figure S3.** Picrate anion with thermal ellipsoid at 100 K (LTP) and 185 K (HTP).

**Figure S4.** DSC measurement of the deuterated sample.

**Figure S5.** Diagram of the Pi-Pi interaction between the picrate anions.

**Table S1.** Crystal data and structure refinement of BEAPM at 100K and 185 K, respectively.

**Table S2** Hydrogen Bond distances (Å and °) related to the hydrogen bonding at 100 K and 185 K.

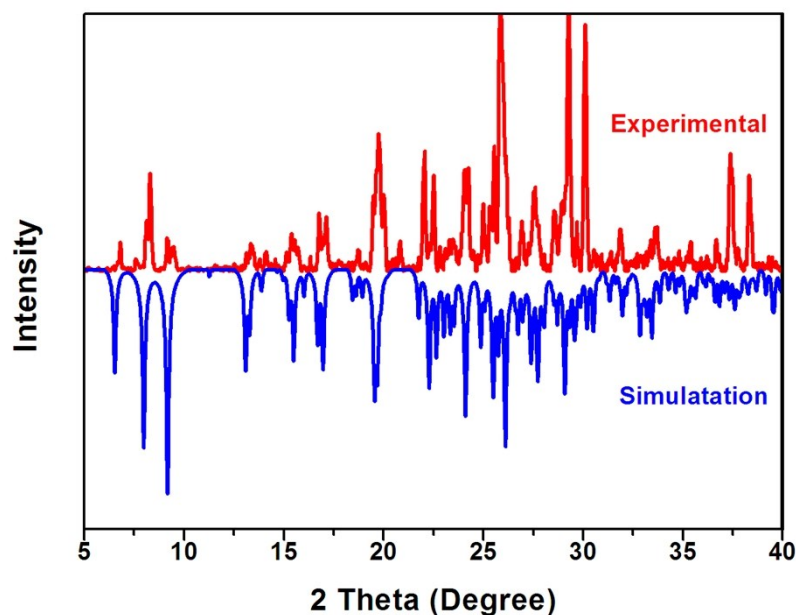

**Figure S1.** Experimental and simulated X-ray powder diffraction patterns of BEAPM at room temperature.

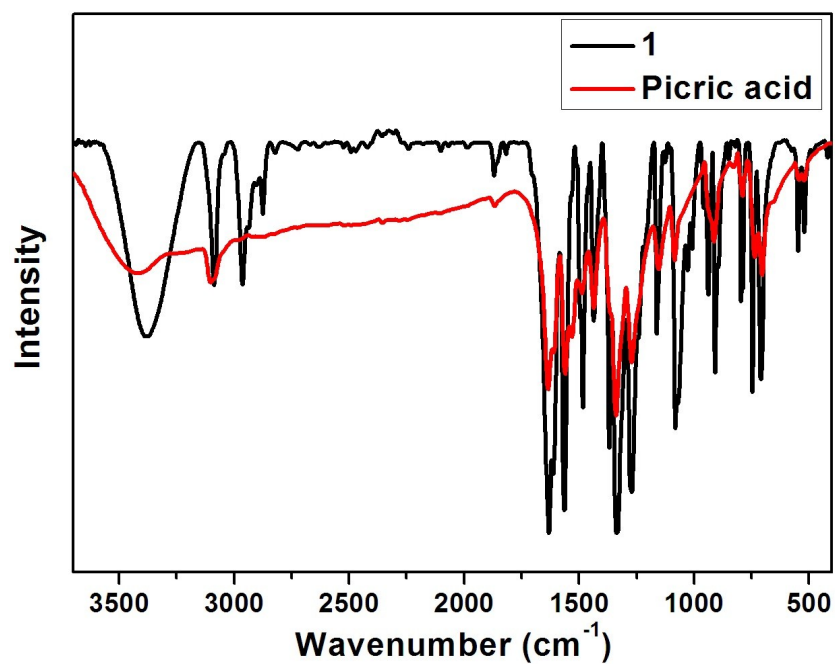

**Figure S2.** Infrared (IR) spectrum of compound BEAPM.

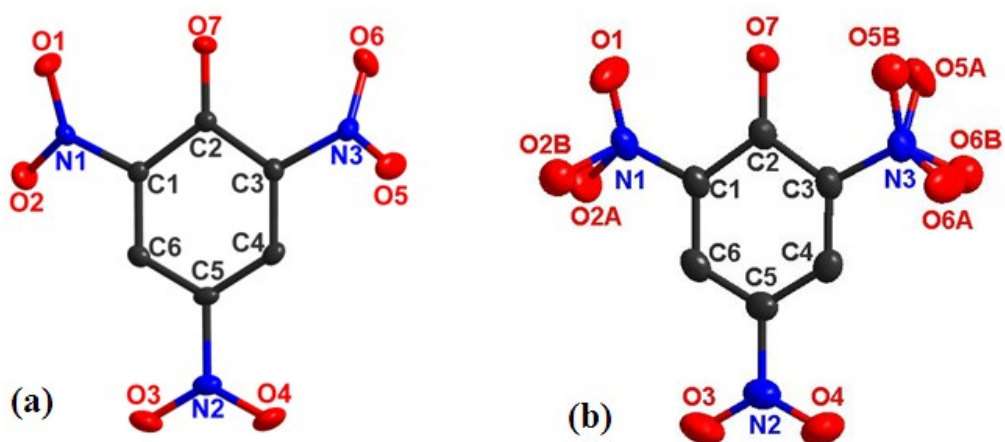

**Figure S3.** Crystal structure of picrate anion in BEAPM. (a) Picrate anion with little thermal ellipsoid at 100 K (LTP); (b) The O2, O5 and O6 are more fairish when split

into two occupied sites at 185 K (HTP). Hydrogen atoms are omitted for clarity.

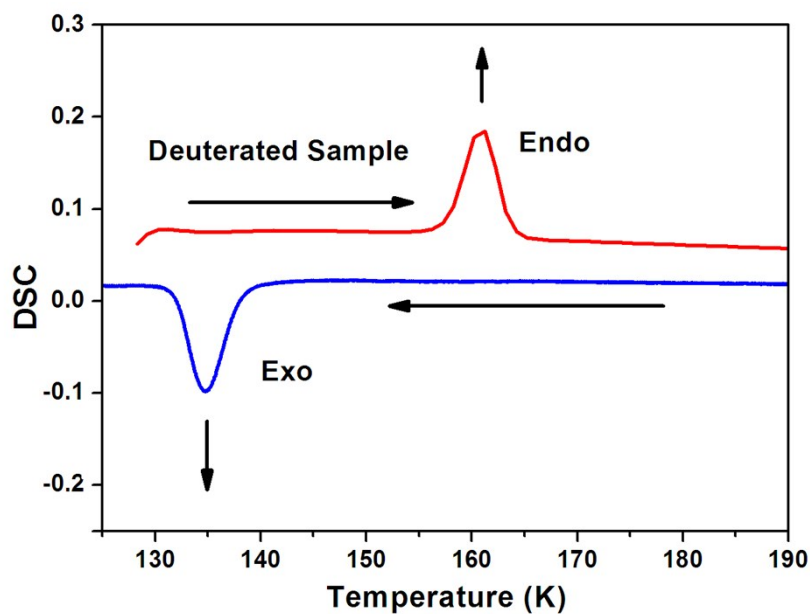

**Figure S4.** DSC curve of deuterated sample of BEAPM.

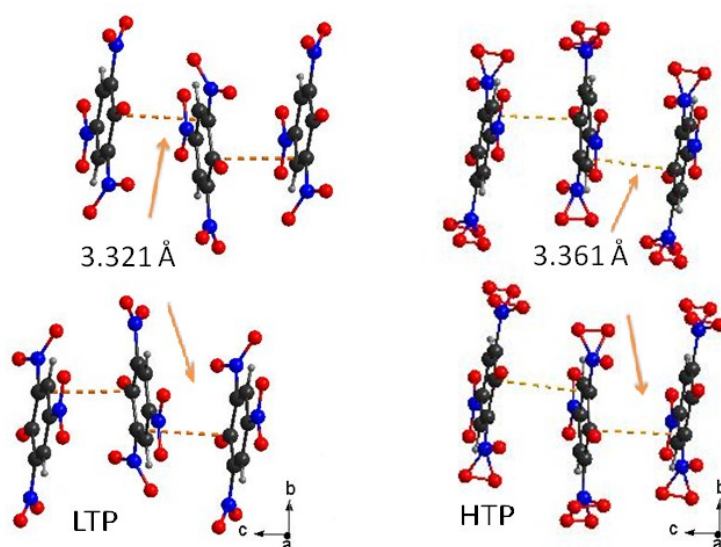

**Figure S5.** Diagrams of the adjacent picrate anions viewed along the *a*-axis at (LTP) and (HTP) of **1**. The dashed lines represent  $\pi$ - $\pi$  interactions between rings of the picrate anion.

**Table S1.** Crystal Data and structure refinement details of **BEAPM** at 175 and 330 K respectively.

|                                                                                          |                                                                |                                                                |
|------------------------------------------------------------------------------------------|----------------------------------------------------------------|----------------------------------------------------------------|
| Sum formula                                                                              | C <sub>14</sub> H <sub>22</sub> N <sub>4</sub> O <sub>10</sub> | C <sub>14</sub> H <sub>22</sub> N <sub>4</sub> O <sub>10</sub> |
| Formula weight                                                                           | 408.36                                                         | 408.36                                                         |
| Temperature (K)                                                                          | 185                                                            | 100                                                            |
| Crystal system                                                                           | Monoclinic                                                     | Monoclinic                                                     |
| Space group                                                                              | <i>P2<sub>1</sub>/c</i>                                        | <i>P2<sub>1</sub>/c</i>                                        |
| <i>a</i> /Å                                                                              | 13.5233(2)                                                     | 13.5048(2)                                                     |
| <i>b</i> /Å                                                                              | 19.2674(2)                                                     | 19.1864(3)                                                     |
| <i>c</i> /Å                                                                              | 7.1034(10)                                                     | 7.0567(10)                                                     |
| <i>α</i> / deg                                                                           | 90.0                                                           | 90.0                                                           |
| <i>β</i> / deg                                                                           | 91.585(10)                                                     | 91.40(2)                                                       |
| <i>γ</i> / deg                                                                           | 90.0                                                           | 90                                                             |
| Volume (Å <sup>3</sup> )                                                                 | 1850.15(2)                                                     | 1827.91(5)                                                     |
| <i>Z</i>                                                                                 | 4                                                              | 4                                                              |
| D <sub>calcd</sub> , g cm <sup>-3</sup>                                                  | 1.462                                                          | 1.477                                                          |
| F(000)                                                                                   | 860.0                                                          | 856.0                                                          |
| wR <sub>2</sub> (on <i>F<sub>o</sub></i> <sup>2</sup> , <i>I</i> > 2σ( <i>I</i> ))       | 0.1621(3276)                                                   | 0.1145(3202)                                                   |
| Goodness-of-fit on <i>F</i> <sup>2</sup>                                                 | 1.082                                                          | 1.095                                                          |
| Completeness (%)                                                                         | 99.9                                                           | 98.9                                                           |
| <i>T<sub>min</sub></i> / <i>T<sub>max</sub></i>                                          | 0.642/0.813                                                    | 0.663/0.682                                                    |
| <i>R</i> <sub>1</sub> [on <i>F<sub>o</sub></i> <sup>2</sup> , <i>I</i> > 2σ( <i>I</i> )] | 0.086(2975)                                                    | 0.0413(3056)                                                   |

$$\alpha R_1 = \frac{\sum ||F_o| - |F_c||}{\sum |F_o|}, \quad wR_2 = \frac{[\sum (|F_o|^2 - |F_c|^2) / \sum |F_o|^2]^{1/2}}$$

**Table S2.** Hydrogen-bond geometry (Å, deg) at 100 K and 185 K in compound

BEAPM

---

| <b>185 K</b> | <i>D</i> —H | H... <i>A</i> | <i>D</i> ... <i>A</i> | <i>D</i> —H... <i>A</i> |
|--------------|-------------|---------------|-----------------------|-------------------------|
| O10—H4...O1  | 0.850       | 2.4486        | 2.99                  | 122.651                 |
| N4—HA...O10  | 0.930       | 1.9224        | 2.841                 | 169.028                 |
| O10—HD...O7  | 0.850       | 1.9150        | 3.119                 | 159.485                 |
| O9—H9....O5  | 0.840       | 2.4122        | 3.014                 | 129.233                 |
| O9—H9.....O7 | 0.840       | 1.9407        | 2.724                 | 154.747                 |
| O10—HE...O9  | 0.851       | 2.2171        | 3.084                 | 173.665                 |
| O8—H8...O10  | 0.840       | 1.9621        | 2.983                 | 166.054                 |
| <b>100 K</b> |             |               |                       |                         |
| O10—H4...O1  | 0.850       | 2.3924        | 2.959                 | 124.579                 |
| N4—HA...O10  | 0.930       | 1.9252        | 2.844                 | 169.118                 |
| O10—HE...O7  | 0.850       | 1.9090        | 2.714                 | 157.486                 |
| O8—H8.....O6 | 0.841       | 2.3801        | 3.064                 | 133.092                 |
| O8—H8.....O7 | 0.840       | 1.9456        | 2.7076                | 150.225                 |

---

---

|              |       |        |        |         |
|--------------|-------|--------|--------|---------|
| O10—HE...O8  | 0.850 | 2.2079 | 3.0836 | 168.252 |
| O9—H9....O10 | 0.840 | 2.7556 | 2.7814 | 163.932 |
| O10—HD...O9  | 0.850 | 2.7729 | 2.9858 | 96.124  |

---
